# Supplementary material
Source: PubMed Central journal article supplement (PMC7053407)

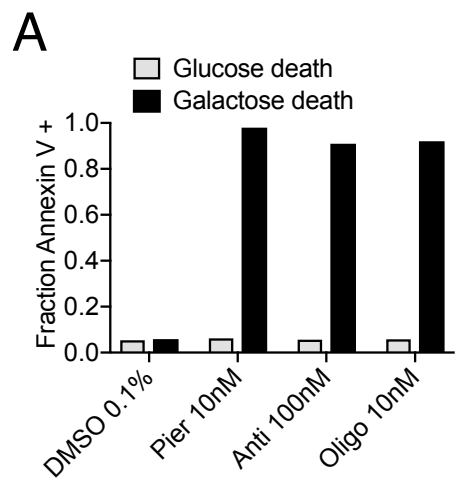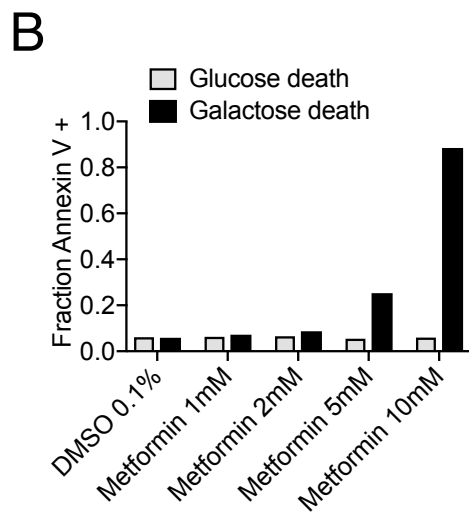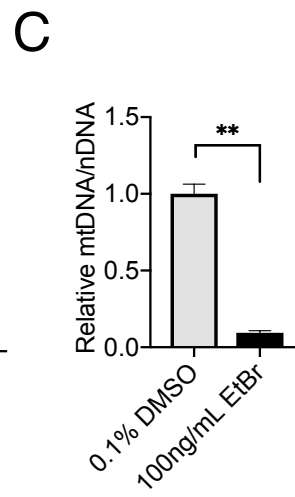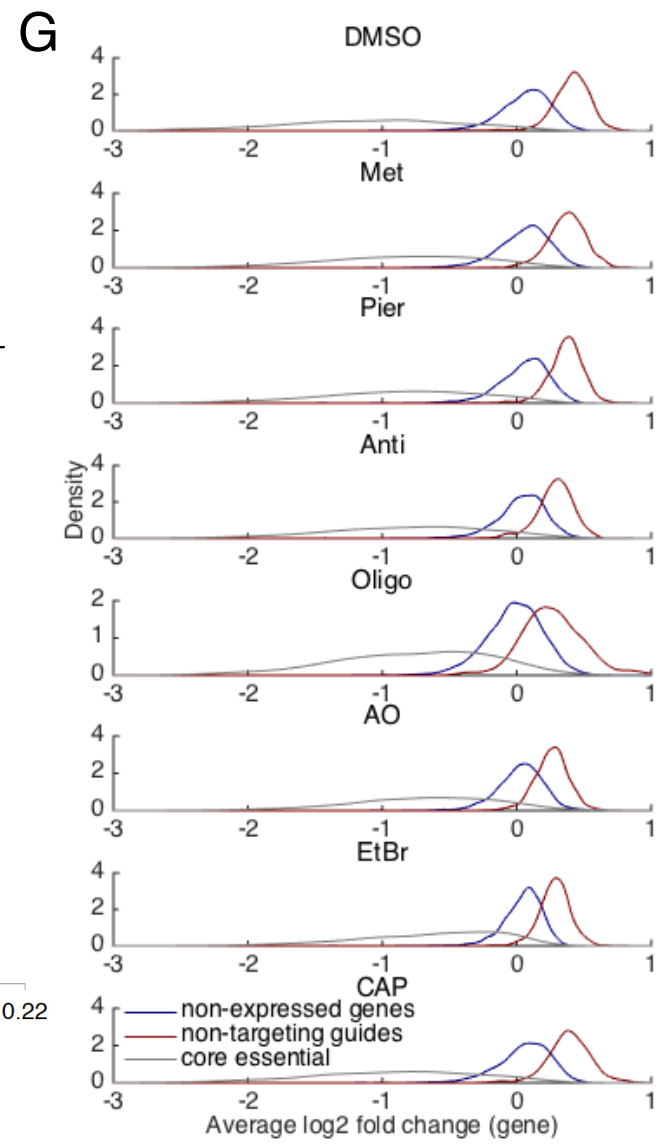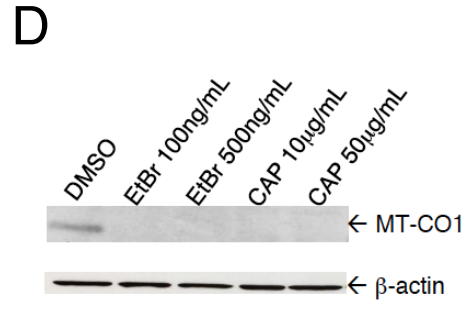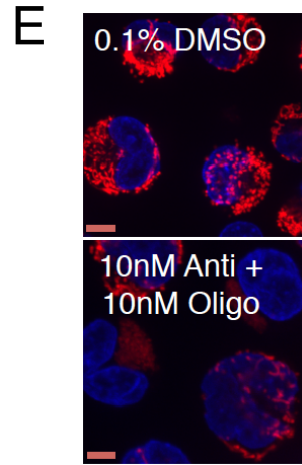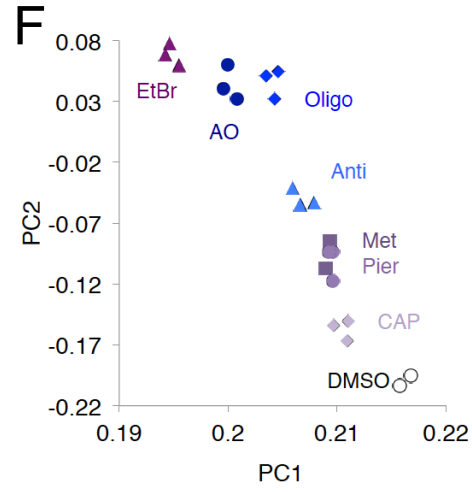

Supplement: NIHMS1542953-supplement-1.pdf [file NIHMS1542953-supplement-1.pdf]

A

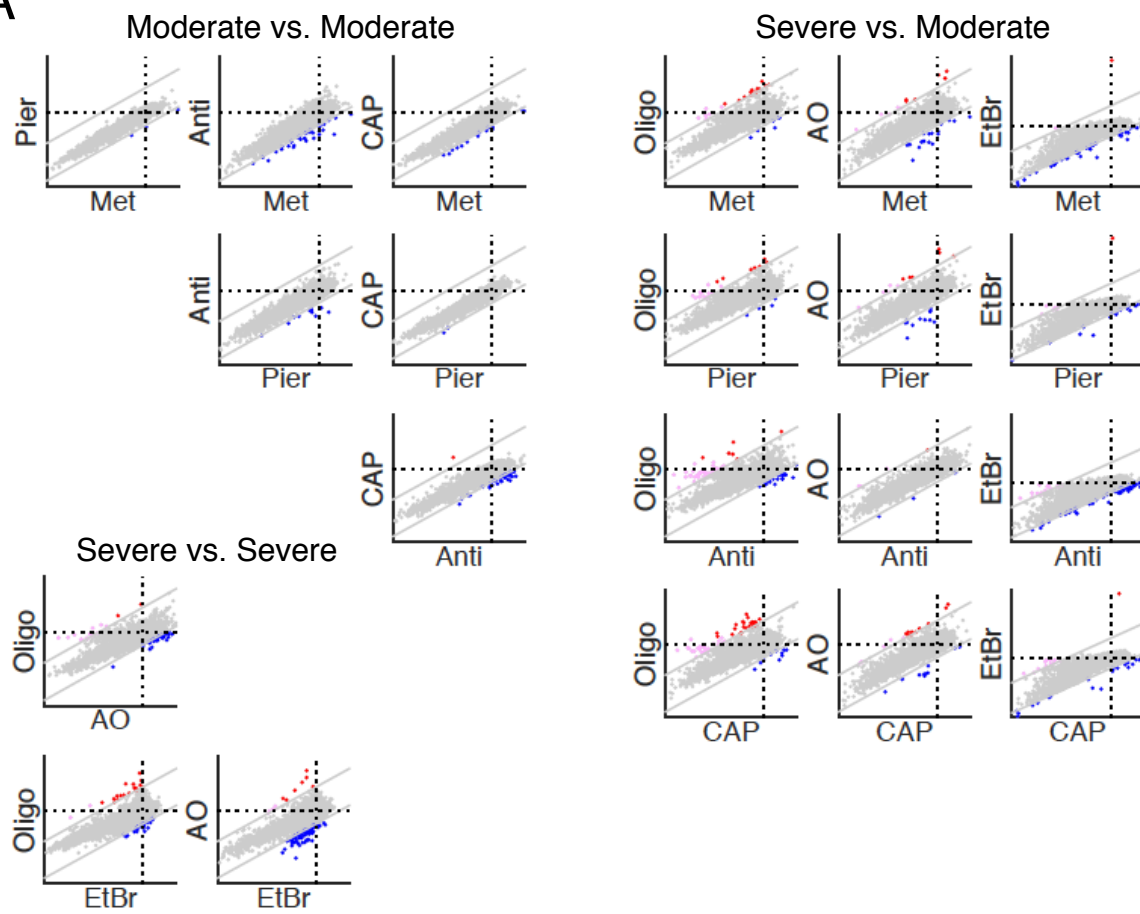

B

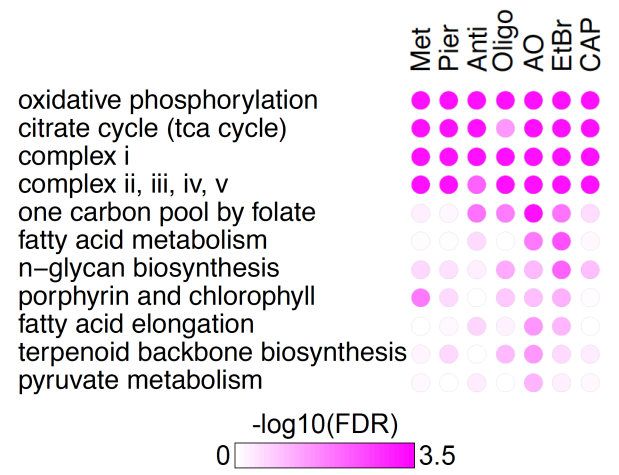

C

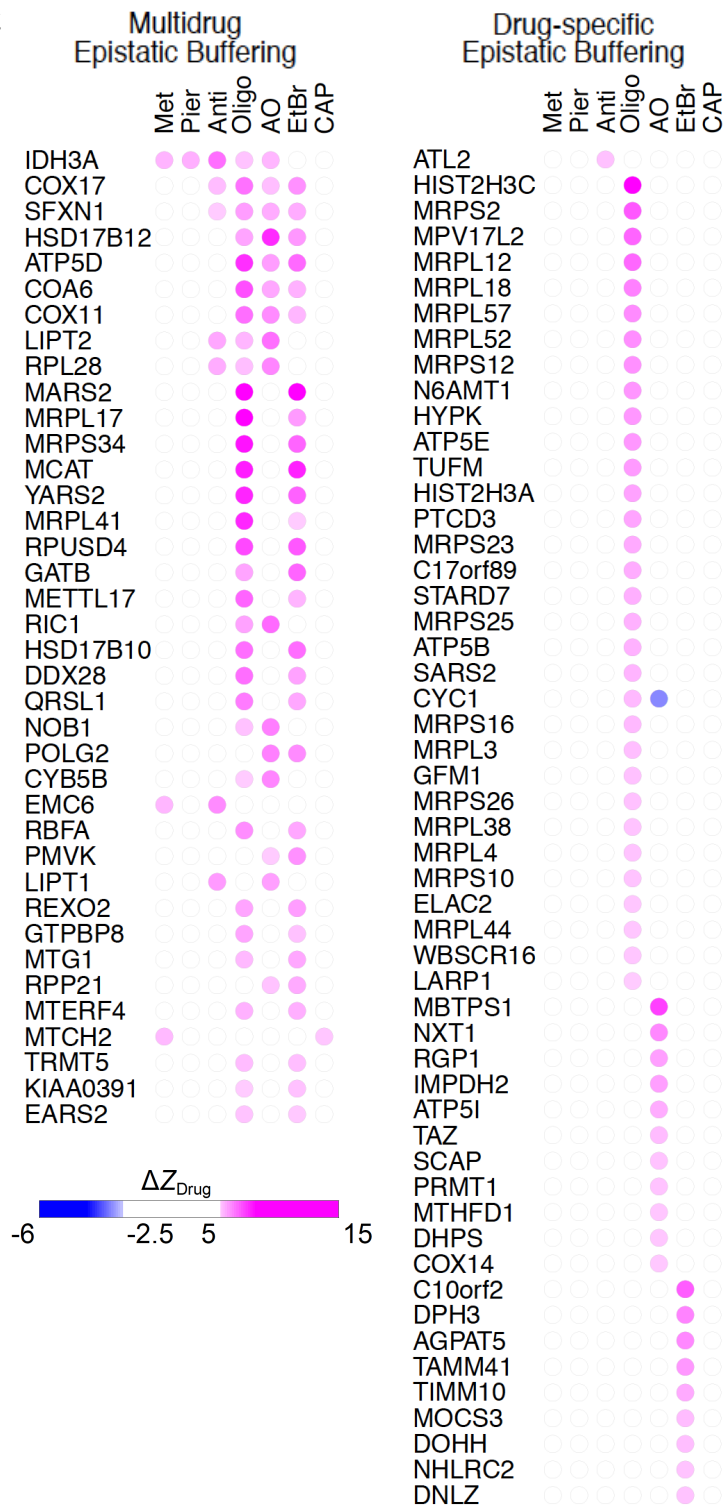

Supplement: NIHMS1542953-supplement-2.pdf [file NIHMS1542953-supplement-2.pdf]

**A**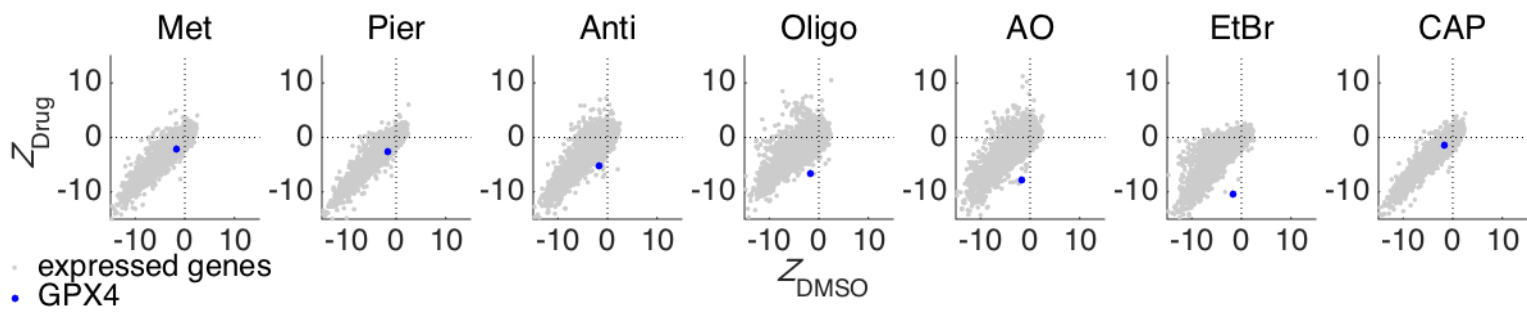**B**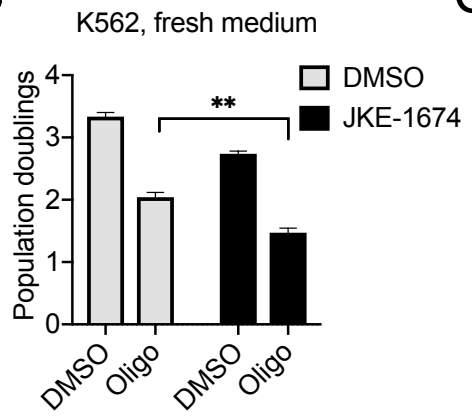**C**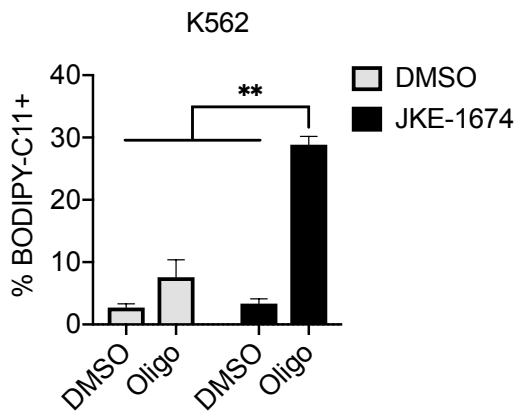**D**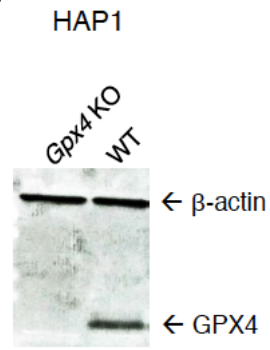**E**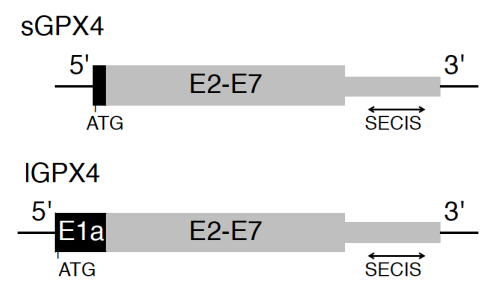**F**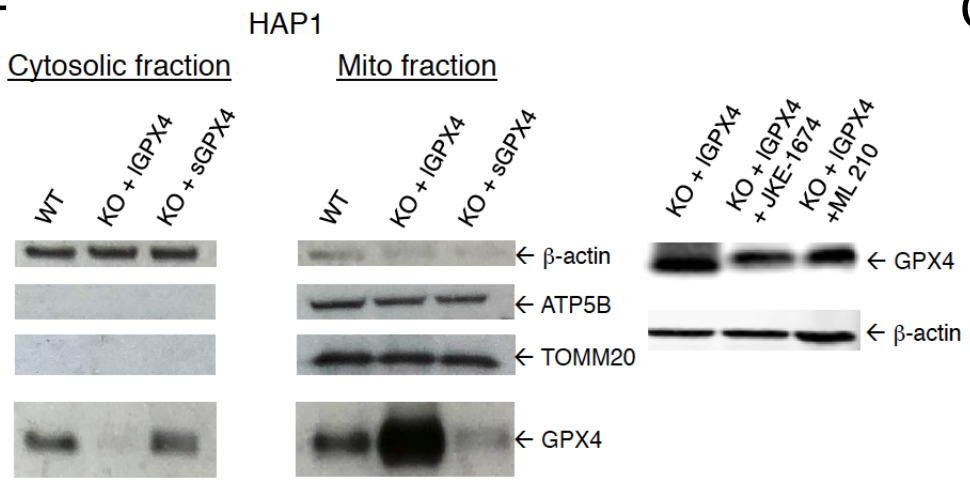**G**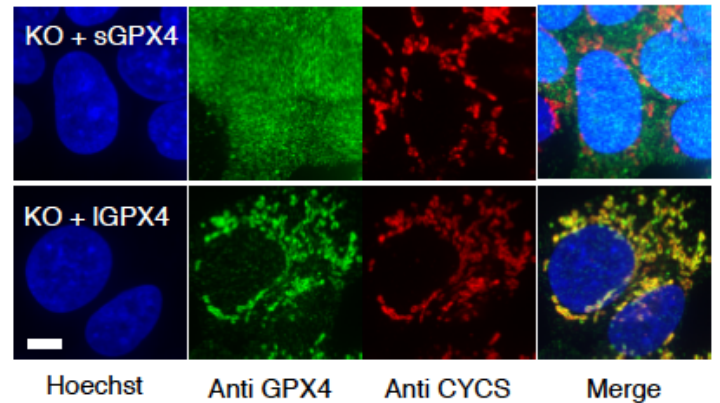

Supplement: NIHMS1542953-supplement-3.pdf [file NIHMS1542953-supplement-3.pdf]
